# Supplementary material
Source: PubMed Central journal article supplement (PMC6940587)
Supplement: Supp_Table1.pdf [file Supp_Table1.pdf]

## Supplementary Data

**Supplementary Table S1.** Hierarchical definition of a wound considered healed

| 1st Level                               | 2nd Level                                 | 3rd Level                                        | 4th Level                              | 5th Level                                                 | WHI Outcome        |
|-----------------------------------------|-------------------------------------------|--------------------------------------------------|----------------------------------------|-----------------------------------------------------------|--------------------|
| <i>Clinician-Assigned Wound Outcome</i> | <i>Size of Last Area (cm<sup>2</sup>)</i> | <i>Change from Maximum Area to Last Area (%)</i> | <i>Deep Wound (Last Depth ≥0.5 cm)</i> | <i>Last Exposed Tissue Type</i>                           | <i>WHI Outcome</i> |
| Healed, died, or missing                | >2.5                                      | >50                                              | Shallow                                | Mild                                                      | Not healed         |
|                                         | 1.25–2.5                                  |                                                  |                                        | Moderate and change from maximum area to last area ≥80%   | Healed             |
|                                         | 0.25–1.25                                 | >30                                              | Shallow                                | Deep                                                      | Not healed         |
|                                         |                                           |                                                  |                                        | Mild                                                      | Healed             |
|                                         |                                           |                                                  |                                        | Moderate and change from maximum area to last area ≥80%   | Healed             |
|                                         |                                           |                                                  |                                        | Mild and change from maximum area to last area ≥80%       | Healed             |
| Healing                                 | Missing                                   | Missing                                          | Shallow                                | Moderate                                                  | Not healed         |
|                                         | >2.5                                      |                                                  |                                        | Mild or (moderate and maximum area ≤2.5 cm <sup>2</sup> ) | Healed             |
|                                         | 1.25–2.5                                  |                                                  |                                        |                                                           | Not healed         |
|                                         | 0.25–1.25                                 | >30                                              | Shallow                                | Mild                                                      | Healed             |

WHI, Wound Healing Index.  
Originally published by Horn et al.<sup>11</sup>
